# Supplementary material for: Removal of Copper, Nickel, and Zinc Ions from an Aqueous Solution through Electrochemical and Nanofiltration Membrane Processes
Source: MDPI journal article supplement (doi:10.3390/app12010280), 2021-12-28
Supplement: s1 [file s1]

**List of Supplementary Table**

Supp. Table 1: Experimental design and responses of the NF process.

Supp. Table 2: Experimental design and responses of the EC process

**Table S1.** Experimental design and responses of the NF process.

| Std.<br>No. | Coded Variables |                |                |                | Responses       |                    |                 |                    |                 |                    |                 |                    |
|-------------|-----------------|----------------|----------------|----------------|-----------------|--------------------|-----------------|--------------------|-----------------|--------------------|-----------------|--------------------|
|             | X <sub>1</sub>  | X <sub>2</sub> | X <sub>3</sub> | X <sub>4</sub> | Y <sub>1</sub>  |                    | Y <sub>2</sub>  |                    | Y <sub>3</sub>  |                    | Y <sub>4</sub>  |                    |
|             |                 |                |                |                | Actual<br>Value | Predicted<br>Value | Actual<br>Value | Predicted<br>Value | Actual<br>Value | Predicted<br>Value | Actual<br>Value | Predicted<br>Value |
| 1           | 4.5             | 10.0           | 10.0           | 15             | 12.39           | 13.16              | 47.34           | 57.59              | 51.42           | 64.36              | 89.57           | 87.78              |
| 2           | 9.5             | 10.0           | 10.0           | 15             | 14.71           | 14.13              | 98.99           | 100.85             | 98.97           | 102.90             | 99.81           | 101.01             |
| 3           | 4.5             | 25.0           | 10.0           | 15             | 30.97           | 31.29              | 44.55           | 53.99              | 49.39           | 59.89              | 88.66           | 85.72              |
| 4           | 9.5             | 25.0           | 10.0           | 15             | 38.71           | 36.5               | 98.41           | 99.33              | 98.67           | 98.43              | 99.60           | 100.72             |
| 5           | 4.5             | 10.0           | 25.0           | 15             | 12              | 13.03              | 36.75           | 44.55              | 47.86           | 56.72              | 82.03           | 80.86              |
| 6           | 9.5             | 10.0           | 25.0           | 15             | 14.32           | 11.89              | 97.93           | 95.64              | 97.82           | 95.27              | 98.93           | 100.11             |
| 7           | 4.5             | 25.0           | 25.0           | 15             | 34.06           | 32.5               | 33.75           | 39.59              | 42.21           | 52.25              | 78.31           | 77.47              |
| 8           | 9.5             | 25.0           | 25.0           | 15             | 36.39           | 35.6               | 95.94           | 92.76              | 95.23           | 90.80              | 97.16           | 98.49              |
| 9           | 4.5             | 10.0           | 10.0           | 35             | 17.03           | 19.14              | 42.52           | 50.13              | 48.78           | 60.02              | 87.03           | 84.39              |
| 10          | 9.5             | 10.0           | 10.0           | 35             | 22.45           | 23.38              | 98.06           | 96.08              | 98.03           | 98.56              | 99.05           | 98.88              |
| 11          | 4.5             | 25.0           | 10.0           | 35             | 45.48           | 47.27              | 40.38           | 46.52              | 45.95           | 55.55              | 84.81           | 82.62              |
| 12          | 9.5             | 25.0           | 10.0           | 35             | 55.47           | 55.75              | 97.93           | 94.56              | 97.42           | 94.09              | 99.01           | 98.87              |
| 13          | 4.5             | 10.0           | 25.0           | 35             | 20.52           | 22.09              | 35.09           | 38.03              | 45.93           | 52.38              | 80.69           | 78.55              |
| 14          | 9.5             | 10.0           | 25.0           | 35             | 23.23           | 24.22              | 96.82           | 91.81              | 96.54           | 90.92              | 97.41           | 99.05              |
| 15          | 4.5             | 25.0           | 25.0           | 35             | 49.66           | 51.56              | 30.48           | 33.05              | 41.57           | 47.91              | 77.94           | 75.44              |
| 16          | 9.5             | 25.0           | 25.0           | 35             | 59.34           | 57.93              | 95.32           | 88.93              | 94.98           | 86.45              | 96.93           | 97.71              |
| 17          | 2.0             | 17.5           | 17.5           | 25             | 22.45           | 18.83              | 36.85           | 14.70              | 70.65           | 36.86              | 52.91           | 59.86              |
| 18          | 12              | 17.5           | 17.5           | 25             | 23.23           | 26.17              | 99.96           | 113.82             | 99.63           | 113.95             | 99.99           | 95.36              |
| 19          | 7.0             | 2.5            | 17.5           | 25             | 4.72            | 2.87               | 82.12           | 75.68              | 80.98           | 79.88              | 96.19           | 96.98              |
| 20          | 7.0             | 32.5           | 17.5           | 25             | 53.54           | 54.71              | 71.03           | 69.19              | 64.13           | 70.94              | 92.05           | 93.58              |
| 21          | 7.0             | 17.5           | 2.5            | 25             | 32.52           | 31.15              | 91.12           | 79.83              | 89.31           | 83.04              | 95.96           | 98.58              |
| 22          | 7.0             | 17.5           | 32.5           | 25             | 32.52           | 33.2               | 58.15           | 61.15              | 56.74           | 67.77              | 90.81           | 90.51              |
| 23          | 7.0             | 17.5           | 17.5           | 5              | 21.68           | 24.74              | 90.49           | 79.31              | 81.79           | 79.75              | 96.78           | 96.57              |
| 24          | 7.0             | 17.5           | 17.5           | 45             | 56.79           | 53.05              | 65.13           | 68.02              | 61.92           | 71.06              | 89.89           | 92.41              |
| 25          | 7.0             | 17.5           | 17.5           | 25             | 26.32           | 26.75              | 90.48           | 89.32              | 86.76           | 75.41              | 92.95           | 92.65              |
| 26          | 7.0             | 17.5           | 17.5           | 25             | 25.78           | 26.75              | 89.01           | 89.32              | 84.87           | 75.41              | 91.45           | 92.65              |
| 27          | 7.0             | 17.5           | 17.5           | 25             | 27.1            | 26.75              | 89.93           | 89.32              | 85.40           | 75.41              | 93.84           | 92.65              |
| 28          | 7.0             | 17.5           | 17.5           | 25             | 26.32           | 26.75              | 87.34           | 89.32              | 82.05           | 75.41              | 91.97           | 92.65              |
| 29          | 7.0             | 17.5           | 17.5           | 25             | 27.87           | 26.75              | 88.59           | 89.32              | 83.19           | 75.41              | 90.94           | 92.65              |
| 30          | 7.0             | 17.5           | 17.5           | 25             | 27.1            | 26.75              | 90.57           | 89.32              | 84.02           | 75.41              | 94.74           | 92.65              |

**Table S2.** Experimental design and responses of the EC process.

| Std No. | Coded Variables |                |                |                | Responses      |                 |                |                 |                |                 |
|---------|-----------------|----------------|----------------|----------------|----------------|-----------------|----------------|-----------------|----------------|-----------------|
|         | X <sub>1</sub>  | X <sub>2</sub> | X <sub>3</sub> | X <sub>4</sub> | Y <sub>1</sub> |                 | Y <sub>2</sub> |                 | Y <sub>3</sub> |                 |
|         |                 |                |                |                | Actual Value   | Predicted Value | Actual Value   | Predicted Value | Actual Value   | Predicted Value |
| 1       | 4.5             | 40             | 10             | 1.0            | 72.89          | 61.01           | 55.66          | 45.10           | 90.22          | 85.79           |
| 2       | 7.5             | 40             | 10             | 1.0            | 86.19          | 76.27           | 78.77          | 72.95           | 98.20          | 93.27           |
| 3       | 4.5             | 80             | 10             | 1.0            | 84.75          | 81.21           | 73.78          | 69.56           | 92.76          | 91.51           |
| 4       | 7.5             | 80             | 10             | 1.0            | 95.30          | 96.63           | 91.46          | 90.42           | 99.48          | 99.30           |
| 5       | 4.5             | 40             | 25             | 1.0            | 37.46          | 32.04           | 30.81          | 24.86           | 87.71          | 82.49           |
| 6       | 7.5             | 40             | 25             | 1.0            | 74.59          | 63.59           | 67.29          | 58.09           | 91.54          | 87.66           |
| 7       | 4.5             | 80             | 25             | 1.0            | 50.02          | 55.49           | 47.49          | 53.37           | 93.16          | 91.83           |
| 8       | 7.5             | 80             | 25             | 1.0            | 96.30          | 87.20           | 89.19          | 79.61           | 98.74          | 97.33           |
| 9       | 4.5             | 40             | 10             | 2.0            | 80.90          | 84.23           | 62.26          | 69.20           | 95.75          | 94.09           |
| 10      | 7.5             | 40             | 10             | 2.0            | 90.12          | 80.71           | 87.78          | 79.21           | 97.90          | 96.57           |
| 11      | 4.5             | 80             | 10             | 2.0            | 94.98          | 102.04          | 90.87          | 97.37           | 97.96          | 99.18           |
| 12      | 7.5             | 80             | 10             | 2.0            | 99.01          | 98.66           | 97.08          | 100.39          | 99.83          | 101.98          |
| 13      | 4.5             | 40             | 25             | 2.0            | 78.04          | 72.77           | 59.56          | 57.90           | 94.53          | 92.05           |
| 14      | 7.5             | 40             | 25             | 2.0            | 87.75          | 85.52           | 71.72          | 73.29           | 94.05          | 92.23           |
| 15      | 4.5             | 80             | 25             | 2.0            | 89.67          | 93.82           | 86.95          | 90.12           | 98.90          | 100.76          |
| 16      | 7.5             | 80             | 25             | 2.0            | 98.79          | 106.73          | 90.66          | 98.52           | 99.50          | 101.27          |
| 17      | 3.0             | 60             | 17.5           | 1.5            | 81.10          | 79.30           | 66.93          | 64.21           | 89.69          | 93.47           |
| 18      | 9.0             | 60             | 17.5           | 1.5            | 95.98          | 107.49          | 92.40          | 100.46          | 99.51          | 101.46          |
| 19      | 6.0             | 20             | 17.5           | 1.5            | 21.92          | 42.97           | 17.68          | 31.64           | 70.91          | 80.92           |
| 20      | 6.0             | 100            | 17.5           | 1.5            | 95.72          | 84.38           | 89.94          | 81.33           | 99.96          | 95.68           |
| 21      | 6.0             | 60             | 2.5            | 1.5            | 99.46          | 106.30          | 98.14          | 102.20          | 99.87          | 102.21          |
| 22      | 6.0             | 60             | 32.5           | 1.5            | 82.53          | 85.40           | 78.82          | 80.10           | 94.80          | 98.19           |
| 23      | 6.0             | 60             | 17.5           | 0.5            | 28.02          | 45.19           | 20.94          | 38.52           | 76.29          | 84.74           |
| 24      | 6.0             | 60             | 17.5           | 2.5            | 95.41          | 87.95           | 93.76          | 81.53           | 99.70          | 96.98           |
| 25      | 6.0             | 60             | 17.5           | 1.5            | 94.47          | 93.51           | 92.79          | 90.88           | 98.64          | 97.05           |
| 26      | 6.0             | 60             | 17.5           | 1.5            | 91.04          | 93.51           | 90.45          | 90.88           | 96.24          | 97.05           |
| 27      | 6.0             | 60             | 17.5           | 1.5            | 91.69          | 93.51           | 90.21          | 90.88           | 95.19          | 97.05           |
| 28      | 6.0             | 60             | 17.5           | 1.5            | 94.55          | 93.51           | 89.91          | 90.88           | 97.33          | 97.05           |
| 29      | 6.0             | 60             | 17.5           | 1.5            | 95.76          | 93.51           | 90.39          | 90.88           | 98.91          | 97.05           |
| 30      | 6.0             | 60             | 17.5           | 1.5            | 93.56          | 93.51           | 91.51          | 90.88           | 95.98          | 97.05           |
